# Supplementary material for: Argonaute 4 as an Effector Protein in RNA-Directed DNA Methylation in Human Cells
Source: PubMed Central journal article supplement (PMC6620710; doi:10.3389/fgene.2019.00645), 2019-07-04
Supplement: DataSheet_1.pdf [file DataSheet_1.pdf]

## SUPPLEMENTARY FILE

1. Supplementary tables

2. Supplementary figures legends

### 1. Supplementary tables

**Table S1** Oligonucleotide sequences used in pyrosequencing.

| <b>PCR primers</b>                |                                                           |                                   |
|-----------------------------------|-----------------------------------------------------------|-----------------------------------|
| <b>Primer</b>                     | <b>Sequences (5'-3')</b>                                  | <b>Annealing temperature (°C)</b> |
| TRDP-FW<br>TRDP-RW-biotin         | AGAAGGTATTGTTGGTGTATAGG<br>CCTCATTTTTTTTACTCTCCCTTACT     | 55                                |
| C16ORF89-FW<br>C16ORF89-RW-biotin | GGGTGGTTTGGGTAAAGGA<br>ACAACCCTCTCCCAACA                  | 56                                |
| ATAT1-FW<br>ATAT1-RW-biotin       | GGGTGTGTAGGGATTGTGTAT<br>AAACATAACCACAAAAAAACTCTCTA       | 56                                |
| MSN-FW<br>MSN-RW-biotin           | TTGTTTAGAGAAGGAAAAGATAGGTAGTGA<br>CTCCTCTCCCACCCTAATCACAA | 59                                |
| <b>Sequencing primers</b>         | <b>Sequences (5'-3')</b>                                  |                                   |
| TRDP                              | GGTTGGTTTTTGGATTATAA                                      | -                                 |
| C16ORF89                          | AAGGGTGGTTGTAGG                                           | -                                 |
| ATAT1                             | GTGAAGTTTTTGGAGTAAT                                       | -                                 |
| MSN                               | GAGTGGGGGTGGGGT                                           | -                                 |

6  
7  
8  
9  
10  
11  
12

13  
 14  
 15  
 16  
 17  
 18  
 19  
 20  
 21  
 22  
 23  
 24  
 25  
 26  
 27  
 28  
 29  
 30  
 31

**Table S2** Oligonucleotide sequences and conditions for PCR and qPCR analyses.

| <b>Primer</b>                    | <b>Sequences (5'-3')</b>                                               | <b>Annealing temperature (°C)</b> |
|----------------------------------|------------------------------------------------------------------------|-----------------------------------|
| LINE-1 met FW<br>LINE-1 met RW   | GTAAAGAAAGGGGTGAYGGT<br>AATACRCRTTTTCTTAAACCRATCTA                     | 55                                |
| Alu met FW<br>Alu met RW         | GGYGYGGTGGTTTAYGTTTGTA<br>CTAACTTTTTATATTTTTAATAAAAAACRAAAT<br>TTCACCA | 57                                |
| AGO4-FW<br>AGO4-RW               | CAGGAATTCAGGGAACCAGCCG<br>CTGCCTTCCGCACTGTCATGATC                      | 56                                |
| GAPDH-FW<br>GAPDH-RW             | TGGAAGGACTCATGACCACAG<br>TTCAGCTCAGGGATGACCTT                          | 56°C – 60                         |
| Copy LINE-1 FW<br>Copy LINE-1 RW | CTCCCAGCGTGAGCG<br>ACTCCCTAGTGAGATGAACCCG                              | 56                                |
| Copy Alu FW<br>Copy Alu RW       | GGCTCACGCCTGTAATCCCAGC<br>GACGGGGTTTCACCATGTTGGCC                      | 69                                |

32 **Table S3** Contingency tables, odds ratios (ORs), 95% confidence intervals, and  $p$ -values. Each  
33 2x2 table shows the association between methylation levels and protein binding sites. **(A)** Only  
34 ChIP DNAs that are perfectly matched with the human genome are included. **(B)** Only ChIP  
35 DNAs that are approximately matched with the human genome are included. This also includes  
36 perfectly matched DNAs.

| Perfect match     |          |        |       |        |       |      |             |           |                |          |       |     |        |       |      |             |          |
|-------------------|----------|--------|-------|--------|-------|------|-------------|-----------|----------------|----------|-------|-----|--------|-------|------|-------------|----------|
| Binding Length    | Protein  | a      | b     | c      | d     | OR   | 95%CI       | p-value   | Binding Length | Protein  | a     | b   | c      | d     | OR   | 95%CI       | p-value  |
| 15                | AGO1     | 5,562  | 560   | 15,866 | 1,978 | 1.24 | 1.12 - 1.37 | 2.13E-05  | 21             | AGO1     | 923   | 91  | 20,505 | 2,447 | 1.21 | 0.97 - 1.51 | 8.75E-02 |
|                   | AGO2     | 2,496  | 176   | 18,932 | 2,362 | 1.77 | 1.51 - 2.07 | 9.73E-13  |                | AGO2     | 307   | 27  | 21,121 | 2,511 | 1.35 | 0.91 - 2.01 | 1.34E-01 |
|                   | AGO3     | 7,603  | 762   | 13,825 | 1,776 | 1.28 | 1.17 - 1.40 | 4.91E-08  |                | AGO3     | 1,141 | 112 | 20,287 | 2,426 | 1.22 | 1.00 - 1.49 | 5.10E-02 |
|                   | AGO4     | 6,476  | 497   | 14,952 | 2,041 | 1.78 | 1.61 - 1.97 | 6.48E-29  |                | AGO4     | 719   | 56  | 20,709 | 2,482 | 1.54 | 1.17 - 2.03 | 1.97E-03 |
|                   | PUMILIO2 | 2,800  | 542   | 18,628 | 1,996 | 0.55 | 0.50 - 0.61 | 4.30E-30  |                | PUMILIO2 | 407   | 49  | 21,021 | 2,489 | 0.98 | 0.73 - 1.33 | 9.13E-01 |
| 16                | AGO1     | 3,038  | 306   | 18,390 | 2,232 | 1.20 | 1.06 - 1.37 | 3.55E-03  | 22             | AGO1     | 790   | 80  | 20,638 | 2,458 | 1.18 | 0.93 - 1.49 | 1.73E-01 |
|                   | AGO2     | 1,227  | 105   | 20,201 | 2,433 | 1.41 | 1.15 - 1.73 | 9.53E-04  |                | AGO2     | 260   | 25  | 21,168 | 2,513 | 1.23 | 0.82 - 1.87 | 3.16E-01 |
|                   | AGO3     | 4,057  | 393   | 17,371 | 2,145 | 1.27 | 1.14 - 1.43 | 2.39E-05  |                | AGO3     | 925   | 88  | 20,503 | 2,450 | 1.26 | 1.01 - 1.57 | 4.43E-02 |
|                   | AGO4     | 3,314  | 242   | 18,114 | 2,296 | 1.74 | 1.51 - 1.99 | 1.90E-15  |                | AGO4     | 540   | 43  | 20,888 | 2,495 | 1.50 | 1.10 - 2.05 | 1.07E-02 |
|                   | PUMILIO2 | 1,579  | 314   | 19,849 | 2,224 | 0.56 | 0.50 - 0.64 | 9.90E-19  |                | PUMILIO2 | 383   | 46  | 21,045 | 2,492 | 0.99 | 0.72 - 1.34 | 9.28E-01 |
| 17                | AGO1     | 1,929  | 199   | 19,499 | 2,339 | 1.16 | 1.00 - 1.35 | 5.18E-02  | 23             | AGO1     | 655   | 66  | 20,773 | 2,472 | 1.18 | 0.91 - 1.53 | 2.03E-01 |
|                   | AGO2     | 678    | 55    | 20,750 | 2,483 | 1.48 | 1.12 - 1.95 | 5.81E-03  |                | AGO2     | 232   | 23  | 21,196 | 2,515 | 1.20 | 0.78 - 1.84 | 4.13E-01 |
|                   | AGO3     | 2,578  | 232   | 18,850 | 2,306 | 1.36 | 1.18 - 1.57 | 1.88E-05  |                | AGO3     | 706   | 71  | 20,722 | 2,467 | 1.18 | 0.92 - 1.52 | 1.81E-01 |
|                   | AGO4     | 1,934  | 147   | 19,494 | 2,391 | 1.61 | 1.36 - 1.92 | 4.49E-08  |                | AGO4     | 443   | 34  | 20,985 | 2,504 | 1.55 | 1.09 - 2.21 | 1.31E-02 |
|                   | PUMILIO2 | 960    | 166   | 20,468 | 2,372 | 0.67 | 0.57 - 0.79 | 3.51E-06  |                | PUMILIO2 | 346   | 43  | 21,082 | 2,495 | 0.95 | 0.69 - 1.31 | 7.64E-01 |
| 18                | AGO1     | 1,462  | 147   | 19,966 | 2,391 | 1.19 | 1.00 - 1.42 | 4.97E-02  | 24             | AGO1     | 557   | 58  | 20,871 | 2,480 | 1.14 | 0.87 - 1.50 | 3.44E-01 |
|                   | AGO2     | 483    | 35    | 20,945 | 2,503 | 1.65 | 1.17 - 2.33 | 4.15E-03  |                | AGO2     | 210   | 21  | 21,218 | 2,517 | 1.19 | 0.76 - 1.86 | 4.57E-01 |
|                   | AGO3     | 1,927  | 172   | 19,501 | 2,366 | 1.36 | 1.16 - 1.60 | 1.88E-04  |                | AGO3     | 560   | 53  | 20,868 | 2,485 | 1.26 | 0.95 - 1.67 | 1.13E-01 |
|                   | AGO4     | 1,352  | 108   | 20,076 | 2,430 | 1.52 | 1.24 - 1.85 | 4.29E-05  |                | AGO4     | 367   | 29  | 21,061 | 2,509 | 1.51 | 1.03 - 2.21 | 3.31E-02 |
|                   | PUMILIO2 | 686    | 96    | 20,742 | 2,442 | 0.84 | 0.68 - 1.05 | 1.19E-01  |                | PUMILIO2 | 317   | 39  | 21,111 | 2,499 | 0.96 | 0.69 - 1.35 | 8.22E-01 |
| 19                | AGO1     | 1,213  | 121   | 20,215 | 2,417 | 1.20 | 0.99 - 1.45 | 6.34E-02  | 25             | AGO1     | 464   | 36  | 20,964 | 2,502 | 1.54 | 1.09 - 2.16 | 1.28E-02 |
|                   | AGO2     | 398    | 30    | 21,030 | 2,508 | 1.58 | 1.09 - 2.30 | 1.51E-02  |                | AGO2     | 189   | 20  | 21,239 | 2,518 | 1.12 | 0.71 - 1.78 | 6.30E-01 |
|                   | AGO3     | 1,614  | 147   | 19,814 | 2,391 | 1.32 | 1.11 - 1.58 | 1.49E-03  |                | AGO3     | 440   | 44  | 20,988 | 2,494 | 1.19 | 0.87 - 1.62 | 2.79E-01 |
|                   | AGO4     | 1,049  | 83    | 20,379 | 2,455 | 1.52 | 1.21 - 1.91 | 2.63E-04  |                | AGO4     | 305   | 26  | 21,123 | 2,512 | 1.40 | 0.93 - 2.09 | 1.03E-01 |
|                   | PUMILIO2 | 523    | 70    | 20,905 | 2,468 | 0.88 | 0.68 - 1.14 | 3.30E-01  |                | PUMILIO2 | 299   | 35  | 21,129 | 2,503 | 1.01 | 0.71 - 1.44 | 9.47E-01 |
| 20                | AGO1     | 1,037  | 101   | 20,391 | 2,437 | 1.23 | 1.00 - 1.51 | 5.41E-02  |                |          |       |     |        |       |      |             |          |
|                   | AGO2     | 350    | 27    | 21,078 | 2,511 | 1.54 | 1.04 - 2.29 | 2.92E-02  |                |          |       |     |        |       |      |             |          |
|                   | AGO3     | 1,372  | 129   | 20,056 | 2,409 | 1.28 | 1.06 - 1.54 | 9.45E-03  |                |          |       |     |        |       |      |             |          |
|                   | AGO4     | 869    | 67    | 20,559 | 2,471 | 1.56 | 1.21 - 2.01 | 5.00E-04  |                |          |       |     |        |       |      |             |          |
|                   | PUMILIO2 | 439    | 61    | 20,989 | 2,477 | 0.85 | 0.65 - 1.11 | 2.37E-01  |                |          |       |     |        |       |      |             |          |
| Approximate match |          |        |       |        |       |      |             |           |                |          |       |     |        |       |      |             |          |
| Binding Length    | Protein  | a      | b     | c      | d     | OR   | 95%CI       | p-value   | Binding Length | Protein  | a     | b   | c      | d     | OR   | 95%CI       | p-value  |
| 15                | AGO1     | 17,795 | 1,703 | 3,633  | 835   | 2.40 | 2.19 - 2.63 | 1.02E-84  | 21             | AGO1     | 3,940 | 432 | 17,488 | 2,106 | 1.10 | 0.98 - 1.22 | 9.20E-02 |
|                   | AGO2     | 12,918 | 863   | 8,510  | 1,675 | 2.95 | 2.70 - 3.21 | 1.62E-141 |                | AGO2     | 894   | 99  | 20,534 | 2,439 | 1.07 | 0.87 - 1.33 | 5.17E-01 |
|                   | AGO3     | 20,003 | 2,072 | 1,425  | 466   | 3.16 | 2.82 - 3.54 | 4.01E-95  |                | AGO3     | 5,155 | 520 | 16,273 | 2,018 | 1.23 | 1.11 - 1.36 | 6.36E-05 |
|                   | AGO4     | 19,180 | 1,715 | 2,248  | 823   | 4.09 | 3.73 - 4.50 | 1.48E-214 |                | AGO4     | 1,804 | 158 | 19,624 | 2,380 | 1.38 | 1.17 - 1.64 | 1.38E-04 |
|                   | PUMILIO2 | 14,456 | 1,580 | 6,972  | 958   | 1.26 | 1.15 - 1.37 | 1.34E-07  |                | PUMILIO2 | 1,425 | 265 | 20,003 | 2,273 | 0.61 | 0.53 - 0.70 | 1.74E-12 |
| 16                | AGO1     | 16,118 | 1,496 | 5,310  | 1,042 | 2.11 | 1.94 - 2.30 | 4.47E-69  | 22             | AGO1     | 3,338 | 381 | 18,090 | 2,157 | 1.04 | 0.93 - 1.17 | 4.57E-01 |
|                   | AGO2     | 10,357 | 685   | 11,071 | 1,853 | 2.53 | 2.31 - 2.77 | 1.73E-92  |                | AGO2     | 717   | 85  | 20,711 | 2,453 | 1.00 | 0.79 - 1.26 | 9.94E-01 |
|                   | AGO3     | 19,025 | 1,920 | 2,403  | 618   | 2.55 | 2.31 - 2.82 | 2.80E-79  |                | AGO3     | 4,060 | 418 | 17,368 | 2,120 | 1.19 | 1.06 - 1.32 | 2.46E-03 |
|                   | AGO4     | 17,729 | 1,458 | 3,699  | 1,080 | 3.55 | 3.26 - 3.87 | 9.94E-200 |                | AGO4     | 1,252 | 121 | 20,176 | 2,417 | 1.24 | 1.02 - 1.50 | 2.75E-02 |
|                   | PUMILIO2 | 12,752 | 1,430 | 8,676  | 1,108 | 1.14 | 1.05 - 1.24 | 2.14E-03  |                | PUMILIO2 | 1,125 | 215 | 20,303 | 2,323 | 0.60 | 0.51 - 0.70 | 2.41E-11 |
| 17                | AGO1     | 13,188 | 1,247 | 8,240  | 1,291 | 1.66 | 1.53 - 1.80 | 1.33E-33  | 23             | AGO1     | 2,825 | 340 | 18,603 | 2,198 | 0.98 | 0.87 - 1.11 | 7.65E-01 |
|                   | AGO2     | 6,763  | 462   | 14,665 | 2,076 | 2.07 | 1.87 - 2.30 | 1.01E-43  |                | AGO2     | 589   | 76  | 20,839 | 2,462 | 0.92 | 0.72 - 1.17 | 4.76E-01 |
|                   | AGO3     | 16,885 | 1,663 | 4,543  | 875   | 1.96 | 1.79 - 2.14 | 1.23E-51  |                | AGO3     | 3,166 | 347 | 18,262 | 2,191 | 1.09 | 0.97 - 1.23 | 1.37E-01 |
|                   | AGO4     | 14,358 | 1,074 | 7,070  | 1,464 | 2.77 | 2.55 - 3.01 | 3.28E-133 |                | AGO4     | 967   | 96  | 20,461 | 2,442 | 1.20 | 0.97 - 1.49 | 9.11E-02 |
|                   | PUMILIO2 | 9,999  | 1,205 | 11,429 | 1,333 | 0.97 | 0.89 - 1.05 | 4.36E-01  |                | PUMILIO2 | 976   | 187 | 20,452 | 2,351 | 0.60 | 0.51 - 0.71 | 4.47E-10 |
| 18                | AGO1     | 9,490  | 932   | 11,938 | 1,606 | 1.37 | 1.26 - 1.49 | 3.59E-13  | 24             | AGO1     | 2,395 | 306 | 19,033 | 2,232 | 0.92 | 0.81 - 1.04 | 1.85E-01 |
|                   | AGO2     | 3,650  | 279   | 17,778 | 2,259 | 1.66 | 1.46 - 1.89 | 7.68E-15  |                | AGO2     | 504   | 65  | 20,924 | 2,473 | 0.92 | 0.71 - 1.19 | 5.13E-01 |
|                   | AGO3     | 13,149 | 1,267 | 8,279  | 1,271 | 1.59 | 1.47 - 1.73 | 8.63E-29  |                | AGO3     | 2,462 | 272 | 18,966 | 2,266 | 1.08 | 0.95 - 1.23 | 2.47E-01 |
|                   | AGO4     | 9,281  | 658   | 12,147 | 1,880 | 2.18 | 1.99 - 2.40 | 2.03E-63  |                | AGO4     | 764   | 86  | 20,664 | 2,452 | 1.05 | 0.84 - 1.32 | 6.49E-01 |
|                   | PUMILIO2 | 6,505  | 920   | 14,923 | 1,618 | 0.77 | 0.70 - 0.84 | 1.29E-09  |                | PUMILIO2 | 876   | 172 | 20,552 | 2,366 | 0.59 | 0.50 - 0.69 | 3.76E-10 |
| 19                | AGO1     | 6,693  | 666   | 14,735 | 1,872 | 1.28 | 1.16 - 1.40 | 2.51E-07  | 25             | AGO1     | 2,034 | 269 | 19,394 | 2,269 | 0.88 | 0.77 - 1.01 | 7.37E-02 |
|                   | AGO2     | 1,964  | 173   | 19,464 | 2,365 | 1.38 | 1.17 - 1.62 | 8.61E-05  |                | AGO2     | 436   | 57  | 20,992 | 2,481 | 0.90 | 0.68 - 1.20 | 4.79E-01 |
|                   | AGO3     | 9,348  | 910   | 12,080 | 1,628 | 1.38 | 1.27 - 1.51 | 7.39E-14  |                | AGO3     | 1,897 | 229 | 19,531 | 2,309 | 0.98 | 0.85 - 1.13 | 7.66E-01 |
|                   | AGO4     | 5,046  | 370   | 16,382 | 2,168 | 1.80 | 1.61 - 2.02 | 1.66E-24  |                | AGO4     | 625   | 70  | 20,803 | 2,468 | 1.06 | 0.82 - 1.36 | 6.52E-01 |
|                   | PUMILIO2 | 3,739  | 590   | 17,689 | 1,948 | 0.70 | 0.63 - 0.77 | 7.04E-13  |                | PUMILIO2 | 801   | 154 | 20,627 | 2,384 | 0.60 | 0.50 - 0.72 | 1.40E-08 |
| 20                | AGO1     | 4,877  | 520   | 16,551 | 2,018 | 1.14 | 1.03 - 1.27 | 9.59E-03  |                |          |       |     |        |       |      |             |          |
|                   | AGO2     | 1,242  | 129   | 20,186 | 2,409 | 1.15 | 0.95 - 1.38 | 1.43E-01  |                |          |       |     |        |       |      |             |          |
|                   | AGO3     | 6,632  | 661   | 14,796 | 1,877 | 1.27 | 1.16 - 1.40 | 3.79E-07  |                |          |       |     |        |       |      |             |          |
|                   | AGO4     | 2,843  | 233   | 18,585 | 2,305 | 1.51 | 1.32 - 1.74 | 5.85E-09  |                |          |       |     |        |       |      |             |          |
|                   | PUMILIO2 | 2,111  | 367   | 19,317 | 2,171 | 0.65 | 0.57 - 0.73 | 5.58E-13  |                |          |       |     |        |       |      |             |          |

38 **2. Supplementary figures legends**

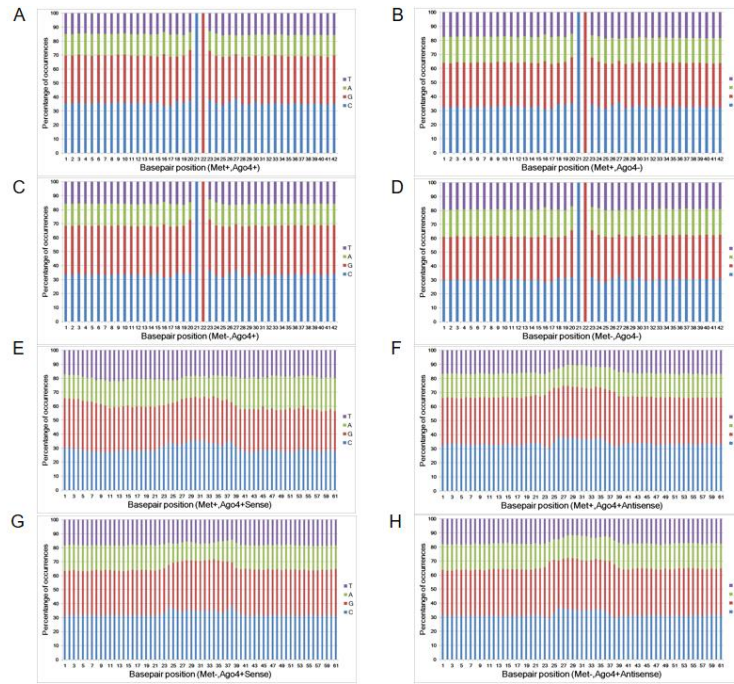

39

40 **Figure S1** Distribution of DNA bases on methylation and AGO4 binding sites. Raw data of  
 41 promoter methylation arrays provided both genomic location and methylation levels through  
 42 15 probes per one gene promoter. Each probe is 50 bp in length. Met+ is referred to as the  
 43 methylation level in the 80<sup>th</sup> percentile. Remaining methylation levels were referred to as Met-  
 44 . ClipZ database provided the genomic locations of AGO binding sites. Each binding site is  
 45 about 15-20 bp in length. AGO4+ is referred to as the overlap between an AGO4 binding site  
 46 and a methylation probe, while AGO4- is referred to as no AGO4 binding sites on a methylation  
 47 probe. **(A to D)** The distribution categorized by (Met+, AGO4+), (Met+, AGO4-), (Met-,  
 48 AGO4+), and (Met-, AGO4-), respectively. Sense strands were collected from every CpG on  
 49 the methylation probes by centering CpG between 20-bp flanking sequences on the left and on  
 50 the right. A total length was 42 bp. **(E to H)** The distribution categorized by (Met+,  
 51 AGO4+sense), (Met+, AGO4+Antisense), (Met+, AGO4+Antisense), (Met-, AGO4+Sense),  
 52 and (Met-, AGO4+Antisense), respectively where “Sense/Antisense” denotes the orientation  
 53 of AGO4 binding sites. The sense strands of AGO4 binding sites were centered and then  
 54 padded with flanking sequences. A total length was 61bp.

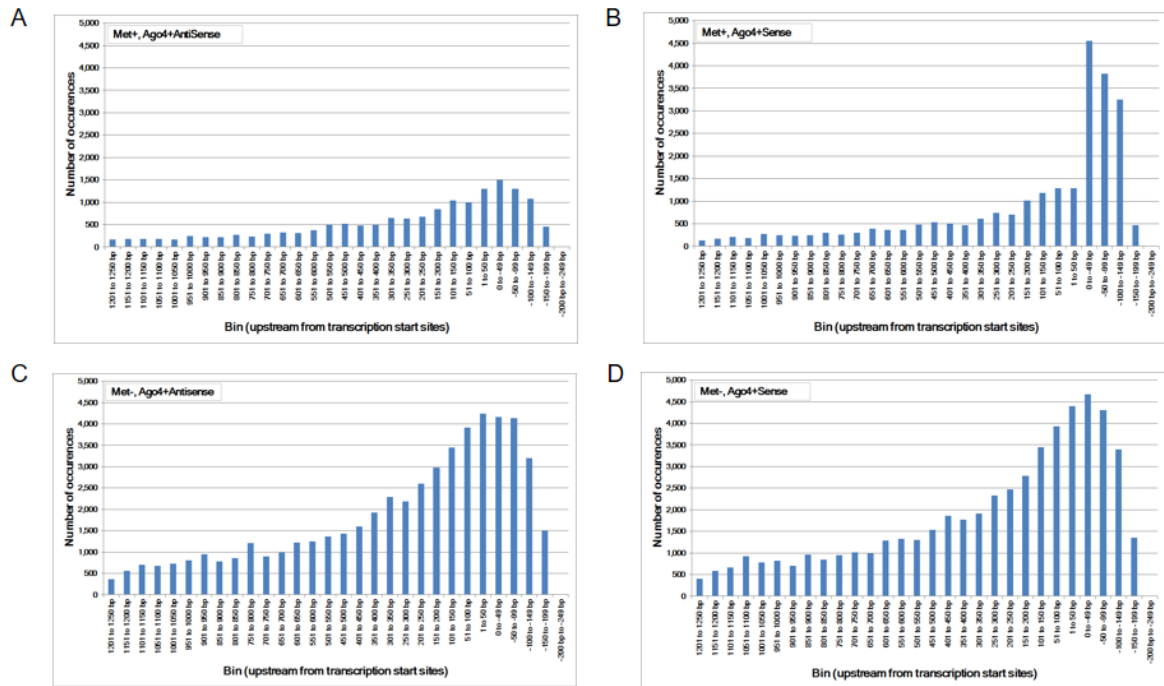

55

56 **Figure S2** Distribution of AGO4 binding sites on gene promoters. (A to D) Distribution of  
 57 (Met+,AGO4+antisense), (Met+,AGO4+sense), (Met-,AGO4+antiense), and (Met-  
 58 ,AGO4+sense), respectively. Definitions of Met+, Met-, AGO4+, AGO4-, sense, and antisense  
 59 are given in supplementary figure S1.

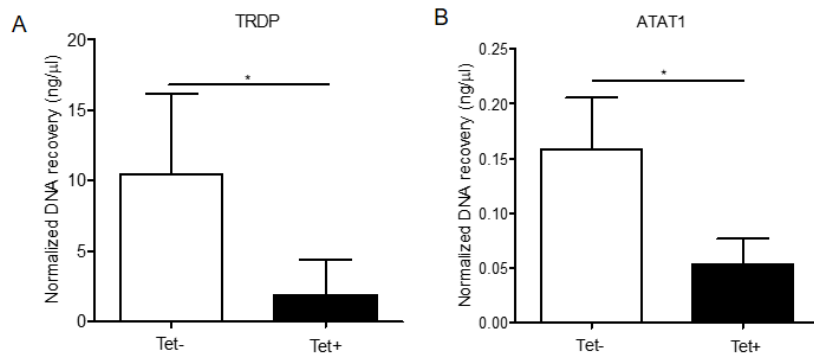

60

61 **Figure S3** Proving of AGO4-binding genes. The graphs showed AGO4 quantities compared  
 62 between the presence and absence of AGO4 in HEK293 cells, respectively. In Tet- condition,  
 63 it significantly showed a higher amount of AGO4-binding genes than Tet+ condition (A) *TRDP*  
 64 and (B) *ATAT1*, tested by a paired-sample T-test:  $p < 0.05$  is represented as \*.

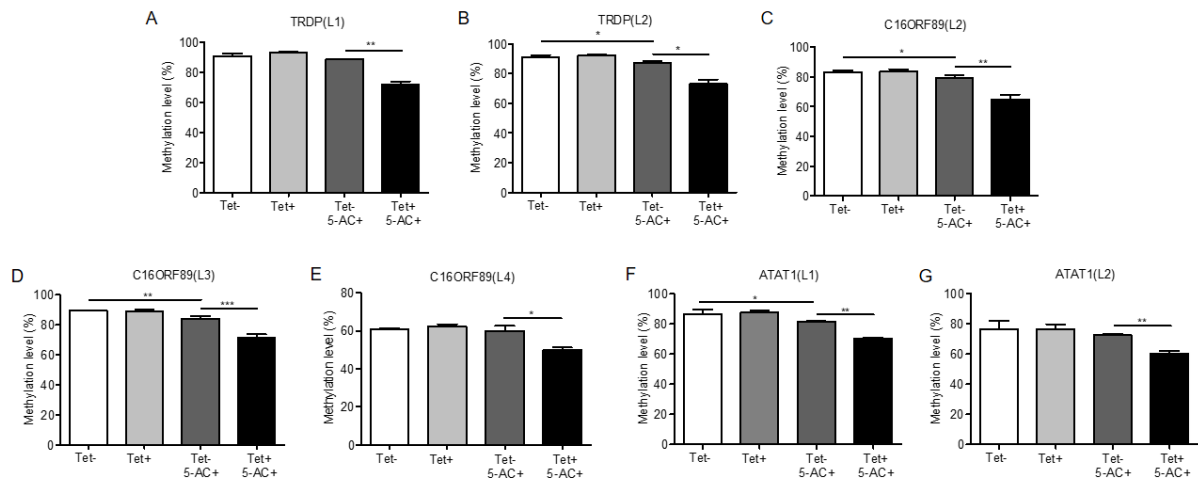

65

66 **Figure S4** Confirmation of AGO4 protein associated to methylation level in AGO4-binding  
67 genes, independently function to DNA methyltransferase (DNMT). Each CpG location  
68 (represented as L) found in genes of interest was observed. Whether or not presence of AGO4  
69 (Tet-, Tet+), methylation level in every gene did not change; however, when 5'-azacytidine  
70 was applied with the presence of AGO4 (Tet-, Aza+), methylation level in AGO4-binding  
71 genes was significantly promoted compared to the absence of AGO4 (Tet+, Aza+) (A to B)  
72 *TRDP*(L1) and (L2) (C to E) *C16ORF89*(L2), (L3) and (L4), respectively (F to G) *ATAT1*(L1)  
73 and (L2). Statistics was analyzed using a paired-sample T-test:  $p < 0.05$ ,  $p < 0.01$  and  $p < 0.005$   
74 are represented \*, \*\* and \*\*\*, respectively.

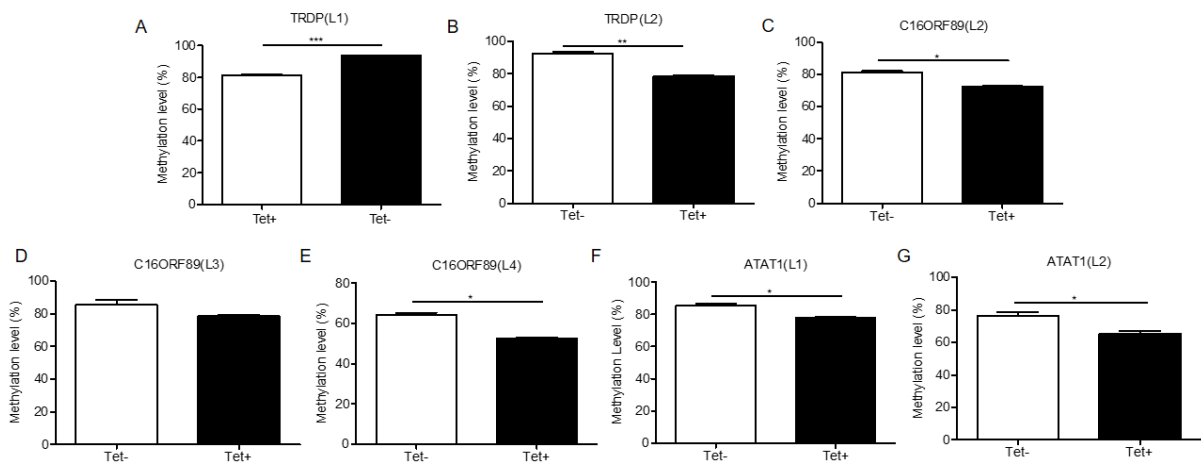

75

76 **Figure S5** Recovery of methylation level in some gene-containing AGO4-binding sites, in  
77 concordance with the presence of the AGO4 proteins after withdrawal of 5'-azacytidine. The  
78 graphs depicted that methylation level was increased in Tet+ treated HEK293 cells, statistical  
79 test using a paired-sample T-test was shown where  $p < 0.05$ ,  $p < 0.01$  and  $p < 0.005$  are represented  
80 as \*, \*\* and \*\*\*, respectively. (A to B) *TRDP*(L1) and (L2) (C to E) *C16ORF89*(L2), (L3)  
81 and (L4) (F to G) *C6ORF134*(L1) and (L2).

### Tet

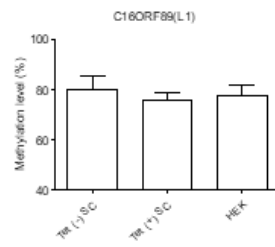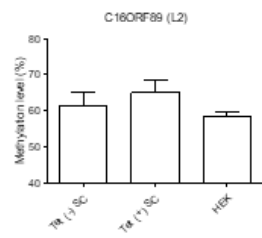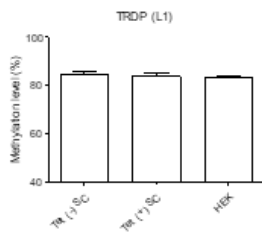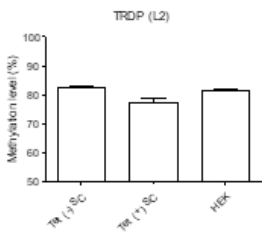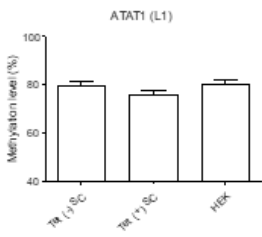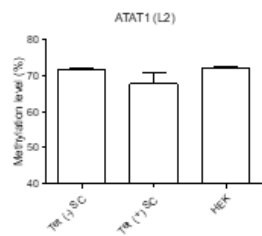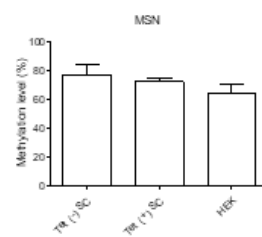

### 5-AC and combined Tet+5-AC

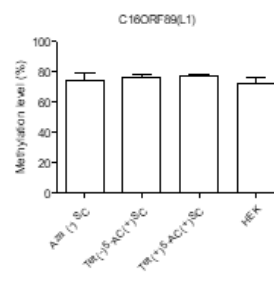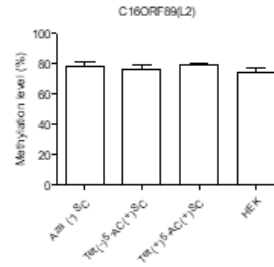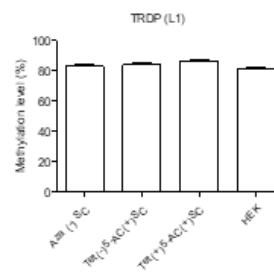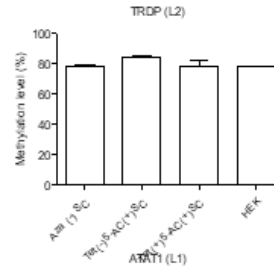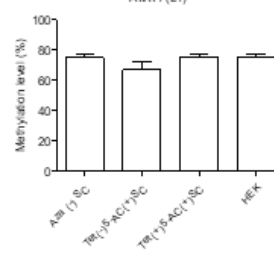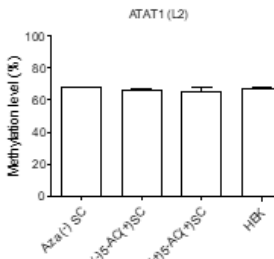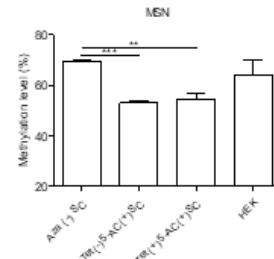

83 **Figure S6** Tetracycline (Tet) (the first panel), and 5'-azacytidine and combined tetracycline  
84 and 5'-azacytidine treatment (the second panel) in scramble shRNA transfected HEK293 cells.  
85 Methylation levels were observed in AGO4-binding genes: *C16ORF89* (L1 to L2), *TRDP* (L1  
86 and L2), *ATAT1* (L1 and L2) and non AGO4-binding gene, *MSN*. Statistical test using an  
87 unpaired T-test was shown where  $p < 0.05$  is represented as \*\*, and SC means scramble shRNA  
88 transfected cells.

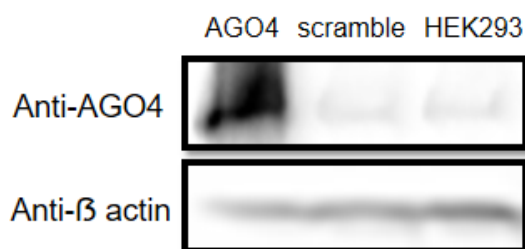

89  
90 **Figure S7** AGO4 protein expression in AGO4 plasmid and scramble shRNA transfected- and  
91 untransfected HEK293 cells at 48 hours after transfection. AGO4 protein was upregulated in  
92 AGO4 plasmid transfected HEK293 while scramble shRNA transfected HEK293 showed low  
93 level of AGO4 protein as same as in untransfected HEK293 cells. β-actin was used to confirm  
94 equal protein loading of each lane.
